# Supplementary figures and images for: Di-2-pyridyl ketone oxime in copper chemistry: di-, tri-, penta- and hexanuclear complexes
Source: Royal Society of Chemistry journal article supplement (doi:10.1039/b700902j), 2007-01-01

Supplementary Information

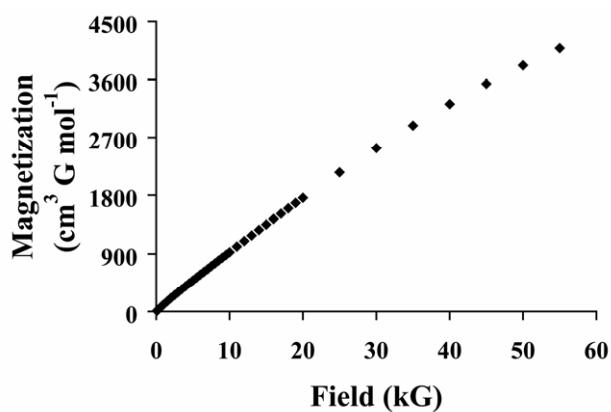

Figure S1

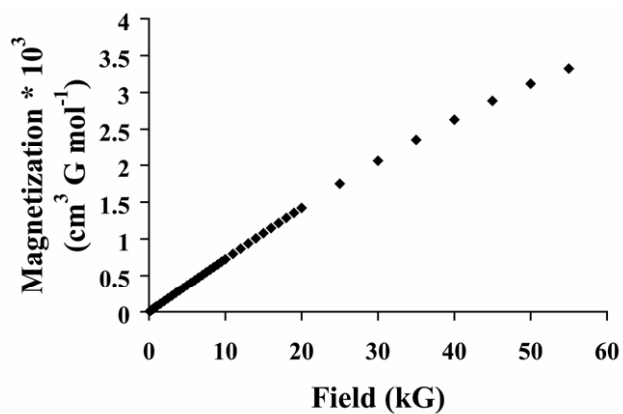

Figure S2

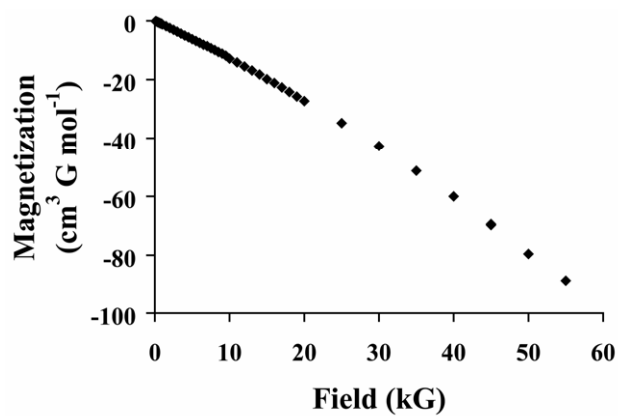

Figure S3

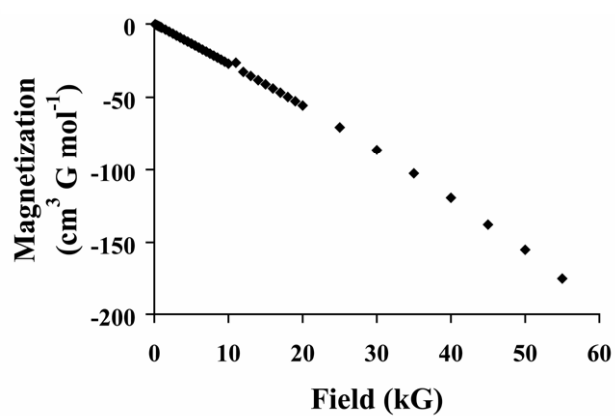

Figure S4

Supplement: b700902j.pdf [file b700902j.pdf]
